# Supplementary material
Source: PubMed Central journal article supplement (PMC7116672)
Supplement: EMS114216-supplement-Methods_online.pdf [file EMS114216-supplement-Methods_online.pdf]

677 **METHODS ONLINE**

678

679 **Animals.** All experiments were conducted according to the UK Home Office Project Licenses  
680 70/7543, P14FED054 or PF4639B40. Male and female adult mice were used for *in vivo* experiments.  
681 Animals were housed in individually ventilated cages and fed on standard chow. Double mutant  
682 *Ahcre<sup>ERT</sup>Rosa26<sup>flEYFP/wt</sup>*, *R26<sup>M2rtTA</sup>/TetO-HGFP*, *Ahcre<sup>ERT</sup>Rosa26<sup>flConfetti/wt</sup>* and *AhCre<sup>ERT</sup>Rosa26<sup>flDNM-GFP/wt</sup>*  
683 animals on a C57BL/6N background were generated as described previously<sup>1-4</sup>. Triple mutant  
684 *AhCre<sup>ERT</sup>R26<sup>flDNM-GFP/Confetti</sup>* mice were generated by crossing *Ahcre<sup>ERT</sup>*, *R26<sup>flConfetti/wt</sup>* and *R26<sup>flDNM-GFP/wt</sup>*  
685 mice. C57BL/6N wild type mice were also used as indicated.

686

687 **Chemically induced mutagenesis.** To generate mutations in the esophageal epithelium, mice were  
688 treated with Diethylnitrosamine (DEN, Sigma Cat# N0756) in sweetened drinking water (40 mg per  
689 1,000 ml) for 24 hours 3 days a week (Monday, Wednesday and Fridays) for 8 weeks<sup>2</sup>. After each  
690 dosage mice received sweetened water until the next DEN treatment. Control mice received  
691 sweetened water as vehicle for the length of the treatment. After the 8 weeks, all mice were  
692 administered normal water until the collection date.

693

694 **Whole mount sample preparation.** Mouse esophagus was dissected, cut longitudinally and the  
695 muscle layer removed by gently pulling with forceps. The entire tissue was then incubated for 2–3 h  
696 in 5 mM EDTA at 37°C before separating the epithelium from the underlying submucosa with fine  
697 forceps. The whole epithelium was then flattened and fixed in 4% paraformaldehyde for 30 min at  
698 room temperature. Tissues were then washed in PBS and stored at 4°C.

699

700 **Tissue immunostaining.** For tissue immunostaining, wholemounts were blocked for 1 hour in 800µl  
701 of staining buffer (0.5% bovine serum albumin, 0.25% fish skin gelatin, 0.5% Triton X-100 in PBS and  
702 10% donkey serum). Where needed samples were incubated with primary antibodies (anti GFP/YFP,  
703 Thermo Fisher Scientific Cat# A10262; anti Active Caspase 3, Abcam Cat#Ab2302; Alexa Fluor® 647  
704 anti-mouse CD45 Antibody, Biolegend Cat# 103124; anti Cytokeratin 14, Covance Cat# PRB-155P) in  
705 staining buffer overnight at room temperature, followed by 4 washes of 20min with 0.2% Tween-20  
706 in PBS. Samples were then incubated with secondary antibodies (Alexa Fluor 488 Donkey Anti-  
707 Chicken, Jackson ImmunoResearch Cat# 703-545-155; Alexa Fluor 555 Donkey Anti-Rabbit, Thermo  
708 Fisher Scientific Cat# A-31572) in staining buffer for 3h at room temperature and washed as above.  
709 Finally, tissues were incubated overnight at room temperature with 1 µg/ml DAPI or 0.4µM TO-

710 PRO™-3 Iodide solution (Thermo Fisher Scientific, Cat# T3605) to stain cell nuclei and mounted using  
711 VECTASHIELD Mounting Media.

712

713 **Confocal microscopy.** Images were acquired on a Leica TCS SP8 (Leica Microsystems) confocal  
714 microscope using ×10, ×20 or ×40 objectives. Typical settings for acquisition of z stacks were optimal  
715 pinhole, line average 3–4, scan speed 400-600 Hz and a resolution of 512 x 512 or 1,024 × 1,024  
716 pixels. Visualisation and image analysis were performed using IMARIS (bitplane), ImageJ or Volocity  
717 3D Image Analysis Software (Perkin Elmer).

718

719 **Histology.** The esophagus from control and DEN-treated mice (12 months post-DEN) were dissected,  
720 fixed in 10% formalin for at least 24h and stored at 4°C. Tissues were then embedded in paraffin and  
721 cut at 5 μm thickness. Sections were stained with hematoxylin and eosin and scanned.

722

723 **Basal cell density.** The basal cell density of the esophageal epithelium was measured at different  
724 time points in control and DEN-treated mice. Whole-mounted tissues were analysed by confocal  
725 imaging and the number of DAPI<sup>+</sup> basal cells per field of view was quantified from 7-10 random  
726 images per animal (2-3 animals per condition and time point).

727

728 **Number of surrounding basal cells.** Confocal images of mouse esophageal epithelium stained with  
729 Dapi and Cytokeratin 14 were used to measure the number of neighbouring cells per basal layer cell.  
730 For this, 100 basal cells per mouse were randomly selected from 10 different images, and the  
731 number of neighboring cells manually counted. A total of 400 cells from 4 mice were measured.

732

733 **In vivo clonal lineage tracing.** To genetically label clones we crossed the appropriate floxed reported  
734 mouse lines ( $Rosa26^{fIEYFP/wt}$ ,  $Rosa26^{fConfetti/wt}$ ,  $Rosa26^{fIDNM-GFP/wt}$  or  $Rosa26^{fIDNM-GFP/Confetti}$ ) with  
735 conditionally inducible  $AhCre^{ERT}$  mice. In these strains, the relevant fluorescent reporters can be  
736 genetically induced following treatment with β-naphthoflavone (BNF, MP Biomedicals Cat# 156738)  
737 and tamoxifen (TAM, Sigma Aldrich Cat# N3633). Specifically, transcription of the *Cre* mutant  
738 estrogen receptor fusion protein (CreERT) is induced following intraperitoneal (i.p) BNF injection. A  
739 subsequent i.p injection of TAM is necessary in order for the CreERT protein to gain access to the  
740 nucleus and excise the loxP flanked “STOP” cassette resulting in the expression of the relevant  
741 reporter. As the switch occurs at the gene level, the descendants of the originally labelled cell  
742 (clones) will also constitutively express the reporter and can be visualised by fluorescent microscopy.  
743 The dose of BNF and TAM can be titrated to label only a small percentage of cells (clonal labelling) to

744 avoid fusion events when the clones expand over time (see details for each strain below). 10-16  
745 week old mice were used for the lineage tracing experiments.

746

747 YFP clones.  $Ahcre^{ERT}R26^{flEYFP/wt}$  (YFP-Cre) mice were used for clonal labelling of the EE with YFP  
748 fluorescent protein (**Fig. 3a**). YFP expression was clonally induced by a single injection of 80 mg kg  
749 BNF and 1 mg TAM to mice control or previously treated with DEN for 2 months. Esophagus from  
750 induced mice were collected at different time points (10 days, 1, 3, 6 and 12 months) post induction,  
751 peeled, fixed and stained with DAPI as described above (*Whole mount sample preparation* and  
752 *Tissue immunostaining*). Whole EEs were imaged by confocal microscopy and the number of clones  
753 as well as the projected YFP clone areas were measured from these images as described below (YFP  
754 *clones number and projected areas*).

755

756 Confetti clones.  $Ahcre^{ERT}R26^{flConfetti/wt}$  mice were used to clonally label cells with one of four different  
757 fluorescent proteins (YFP, GFP, RFP or CFP) (**Fig. 4a**). Animals were treated with DEN in drinking  
758 water for 2 months followed by a single i.p injection of BNF (80 mg kg) and TAM (1mg) to clonally  
759 induce cell labelling. 9 or 18 months later mice were culled and the esophagus dissected. Whole  
760 mount EEs were processed as described above (*Whole mount sample preparation*). Fluorescent  
761 clones were imaged and their areas measured using Volocity 3D Image Analysis Software (Perkin  
762 Elmer). Selected individual confetti clones were then extracted and processed for DNA whole exome  
763 sequencing as described below (*Confetti clone cutting and sequencing*).

764

765 DN-Maml1 clones.  $Ahcre^{ERT}R26^{flDNM-GFP/wt}$  mice were used for clonal induction of the dominant  
766 negative mutant of *Maml1* (*DN-Maml1*) (**Extended Data 8a**). This mutant inhibits Notch intracellular  
767 domain induced transcription, therefore disrupting the Notch signalling pathway<sup>4</sup>. It is also fused to  
768 GFP, which allows for clonal labelling of the mutant. Clonal induction of *DN-Maml1* was achieved by  
769 a single injection of BNF (0.08 mg/Kg) and TAM (0.25mg) to control or DEN-treated mice. Esophagus  
770 were collected at different time points (10 days, 1, 3, 6 and 12 months) after induction. Tissues were  
771 processed, stained with anti-GFP antibody and imaged on a confocal microscope as described above  
772 (*Whole mount sample preparation, tissue immunostaining* and *Confocal microscopy*). The coverage  
773 (% of the total EE occupied by mutant clones) of *DN-Maml1* clones was measured using Volocity 3D  
774 Image Analysis Software (Perkin Elmer).

775

776 Confetti-MAML clones.  $Ahcre^{ERT}R26^{flDNM-GFP/Confetti}$  mice (**Extended Data 8d**) were generated to  
777 analyse the relative growth of Confetti clones located either at the edges of or enclosed within *DN-*

778 *Maml1* mutant areas. For this purpose we took advantage of the higher recombination efficiency of  
779 *DN-Maml1* as compared to the Confetti reporter. *Ahcre<sup>ERT</sup>R26<sup>fIDNM-GFP/Confetti</sup>* mice were induced with  
780 a single injection of 80 mg/kg BNF and 1 mg TAM, and esophagus collected 1 month later. This dose,  
781 higher than the one used for the clonal labelling of *Ahcre<sup>ERT</sup>R26<sup>fIDNM-GFP/wt</sup>* mice, generates a large  
782 amount of *DN-Maml1* mutant clones, with only a small percentage of them also expressing the  
783 Confetti reporter. The possible outcomes following this high induction are as follows: either single  
784 induction of *DN-Maml1*, single induction of GFP, YFP, RFP or CFP or double induction of *DN-Maml1*  
785 with one of the 4 Confetti fluorescent proteins (*Confetti-DN-Maml1*). Whole tissues were processed  
786 and imaged as above (*Whole mount sample preparation* and *Confocal microscopy*). The area of  
787 Confetti clones enclosed or at the edges of *DN-Maml1* clones was measured using Volocity 3D Image  
788 Analysis Software (Perkin Elmer). Only red and yellow Confetti clones were quantified.

789

790 **Whole tissue YFP clones number and projected areas.** To measure the number and size of the YFP  
791 clones from the entire mouse esophageal epithelium we developed the following pipeline. Whole  
792 mouse esophageal epithelia were prepared as described above (*Whole mount sample preparation*).  
793 A high precision motorised stage coupled to a Leica TCS SP8 confocal microscope was used to obtain  
794 contiguous 3D images of all epithelial layers (basal + suprabasal) from the entire mouse esophagus,  
795 that were later merged using the mosaic function of the Leica Software. Typical settings for  
796 acquisition of multiple z stacks were 1µm z-step size, zoom x1, optimal pinhole, line average 4, scan  
797 speed 400 Hz and a resolution of 1,024 × 1,024 pixels using a 10X HC PL Apo CS Dry objective with a  
798 0.4NA. The Leica LIF files containing the merged images were then processed using Volocity 3D  
799 Image Analysis Software. To identify individual clones and measure their projected surface area  
800 images were opened using the “extended focus” visualization mode on the Volocity 3D software.  
801 Clones were then identified with the “find objects” function using a lower and upper intensity  
802 threshold of 25 and 255, respectively, with a minimum object size of 50µm<sup>2</sup> and a restrictive radius  
803 of 10µm.

804

805 **In vivo transgenic label-retaining cell assay.** *Rosa26<sup>M2rtTA</sup>/TetO-HGFP* mice were used to measure  
806 the rate of cell division in the EE following DEN treatment. These mice are double transgenic for a  
807 reverse tetracycline-controlled transactivator (rtTA-M2) targeted to the Rosa 26 locus and a  
808 *HIST1H2BJ/EGFP* fusion protein (Histone-Green Fluorescent Protein, HGFP) expressed from a  
809 tetracycline promoter element. Treatment of these mice with doxycycline (Doxy, Sigma Aldrich Cat#  
810 D9891) induces the transient expression of HGFP, resulting in nuclear fluorescent labelling  
811 throughout the entire epithelium. When Doxy is withdrawn, HGFP is no longer expressed and is

812 diluted lineally by half after every cell division cycle. Therefore, the decline in fluorescence intensity  
813 can be measured to calculate the cell division rate. *Rosa26<sup>M2rtTA</sup>/TetO-HGFP* mice received DEN or  
814 sweetened water for 2 months as described above. 2 months after finishing the treatments all mice  
815 were administered Doxy (2mg/ml) in sweetened water for 4 weeks. Mice were culled and tissues  
816 collected either immediately (t = 0) or 7 days (t =7) after Doxy withdrawal (time post-DEN = 3  
817 months). Esophagus were peeled, fixed and stained as detailed above and imaged on a confocal  
818 microscope using a 40x objective. Tissues were stained with CD45 antibody to label immune cells,  
819 which were excluded from the quantifications. The intensity of HGFP in individual basal cells was  
820 analysed using ImageJ. The average proliferation rate in control and DEN tissues was calculated  
821 using the ratios between the HGFP intensity of cells at times 0 and 7 days. Between 2599 and 4766  
822 basal cells were analysed per condition and time point from 2-3 animals and 8 images per tissue.

823

824 **EdU lineage tracing assay.** EdU (5-ethynyl-2'-deoxyuridine) incorporates into dividing cells, present  
825 only at the EE basal layer (**Fig. 1a**). EdU labelled cells can then stay in the basal layer or stratify  
826 upwards into the suprabasal layer. The number of EdU positive cells can therefore be used to  
827 quantify proliferation and differentiation rates in the esophageal epithelium of DEN-treated mice.  
828 Wild type animals received DEN for 2 months as described above. 6 months after DEN treatment  
829 mice were administered 10µg of EdU (i.p.) and the esophagus were collected 48h later. Tissues were  
830 peeled, fixed and EdU detected in wholemounts using a Click-iT EdU imaging kit (Life technologies  
831 Cat# C10086) according to the manufacturer's instructions and imaged by confocal microscopy. The  
832 number of epithelial cells positively stained for EdU was quantified in the basal and suprabasal layers  
833 using Volocity 3D software. A total of 1873 and 2080 EdU positive cells (5 images per animal, 6  
834 animals per group) were counted from control and DEN-treated mice, respectively. Proliferation was  
835 measured as the total number of EdU positive cells present in both basal and suprabasal layers,  
836 whereas the differentiation rate was calculated by dividing the number of EdU positive suprabasal  
837 cells by the total (basal + suprabasal) EdU positive cells.

838

839 **Detection of apoptosis by activated caspase-3 staining.** Mice were treated with DEN for 2 months  
840 and tissues collected 10 days after DEN withdrawal. Whole mounted esophageal epithelia were  
841 stained for activated caspase-3 and imaged by confocal microscopy. The number of caspase-3  
842 positive cells in the basal layer was quantified with ImageJ. A total of 5355 cells were analysed from  
843 11 images per mouse across the whole esophageal epithelium (n=2 mice).

844

845 **Targeted sequencing of mouse esophageal epithelium grid samples.**

846

847 Sample preparation. Mice esophagus were dissected and cut longitudinally before removing the  
848 muscle layer. The entire tissue was then incubated for 2–3 h in 5 mM EDTA at 37 °C before  
849 separating the epithelium from the underlying submucosa with fine forceps. The whole epithelium  
850 was then flattened, fixed in 4% paraformaldehyde for 30 min at room temperature and kept in PBS  
851 at 4 °C. For sequencing, the esophageal epithelium was mapped and cut in 2mm<sup>2</sup> contiguous  
852 biopsies (**Fig. 1c**). Samples were digested and DNA extracted using the QIAMP DNA microkit (QIAGEN  
853 Cat# 56304) following manufacturer's instructions. DNA from the ears of the same mice was  
854 extracted with the same method and used as germline controls.

855

856 DNA sequencing and coverage metrics. We used an Agilent SureSelect custom bait capture  
857 comprising 192 genes designed to include frequently mutated genes in cancer (**Extended Data 1e**).  
858 Samples were multiplexed and sequenced on an Illumina HiSeq 2500 sequencer using paired-end 75-  
859 bp reads. Paired-end reads were aligned with BWA-MEM (v0.7.17, <https://github.com/lh3/bwa>)  
860 <sup>5</sup>with optical and PCR duplicates marked using Biobambam2 (v2.0.86,  
861 <https://gitlab.com/german.tischler/biobambam2>,  
862 <https://www.sanger.ac.uk/science/tools/biobambam>). The median coverage across all samples and  
863 genes after removing off-target reads, PCR duplicates and reads with mapping quality <25 and base  
864 quality <30 was 485.5x, ranging from 445-519x between individuals (**Extended Data 1f**).

865

#### 866 **Single clone isolation and whole exome sequencing.**

867

868 Sample preparation and imaging. *Ahcre*<sup>ERT26<sup>flConfetti/wt</sup> and *Ahcre*<sup>ERT R26<sup>flEYFP/wt</sup> (YFP-Cre) mice were  
869 treated with DEN in drinking water 3 times a week for 8 weeks as described above. After DEN  
870 removal mice were induced by an intraperitoneal (i.p.) injection of 80 mg kg<sup>-1</sup>β-naphthoflavone and  
871 1 mg tamoxifen. 9 or 18 months after induction animals were culled and tissues harvested.  
872 Esophagus were incubated for 2–3 h in 5 mM EDTA at 37 °C before removing the submucosa from  
873 the epithelium as described above. Confetti or YFP labelled clones were imaged on a fluorescent  
874 scope equipped with the appropriate filters. The projected area of the clones was measured using  
875 Volocity 3D Image Analysis Software.</sup></sup>

876

877 Single clone isolation and sequencing. Clones were manually cut under a fluorescent micro-  
878 dissecting scope (Leica Microsystems) using ultra fine forceps and micro-scalpels. Individual clones  
879 were collected in low binding DNA tubes and digested in 3 μl RLT buffer (Qiagen Cat# 1048449) for

880 30min at room temperature. Digested samples were diluted 1:10 in water, separated in triplicates,  
881 transferred to 96-well plates and incubated 15 min at room temperature with Agencourt AMPure XP  
882 magnetic beads (Beckman Coulter Cat# A63881) at a 1:1 ratio. Beads with bound DNA were  
883 separated with a magnet and washed 3 times with 70% ethanol. DNA was resuspended in 10 µl  
884 elution buffer and transferred to a new plate. Whole genome DNA was amplified using 1 µl  
885 polymerase enzyme from the illustra GenomiPhi V2 DNA Amplification Kit (GE Healthcare Cat# 25-  
886 6600-32) and 9 µl of sample with the following conditions: 95 °C for 3 min, 4 °C for 5 min, 30 °C for  
887 1.5 hours and 65 °C for 10min. DNA was then purified by mixing with beads at a 1:0.6 DNA/beads  
888 ratio followed by 3 washes with 70% ethanol and eluted with 30 µl of elution buffer (Qiagen Cat#  
889 19086). Whole-exome sequencing was performed using the Mouse\_Exome\_Targets baitset from the  
890 Wellcome Sanger Institute pipeline. Captured material was sequenced on Illumina HiSeq 2500  
891 sequencers using paired-end 75bp reads.

892

### 893 **Mutation calling, sequence analysis and missense codon distribution in *Notch1***

894 Detailed bioinformatic methods are given in section 2 of the **Supplementary note**.

895

896 **Statistical analysis.** Data are expressed as mean values ± SEM unless otherwise indicated. No  
897 statistical method was used to predetermine sample size. The experiments were not randomized.  
898 The investigators were not blinded to allocation during experiments and outcome assessment.

899

900 **Data availability.** Accession numbers for the targeted sequencing of mouse gridded samples and  
901 WES of isolated single clones are ENA:ERP022921 and ENA:ERP015469, respectively. Individual data  
902 sets are available in Supplementary Tables 1-15.

903

904 **Code availability.** The code developed in this study has been made publicly available and can be  
905 found at <https://github.com/gp10/ClonalCOMMUTE> and <http://doi.org/10.5281/zenodo.3648706>.

906

### 907 **Methods Online References**

- 908 1 Doupe, D. P. *et al.* A single progenitor population switches behavior to maintain and repair  
909 esophageal epithelium. *Science (New York, N.Y.)* **337**, 1091-1093,  
910 doi:10.1126/science.1218835 (2012).
- 911 2 Frede, J., Greulich, P., Nagy, T., Simons, B. D. & Jones, P. H. A single dividing cell population  
912 with imbalanced fate drives oesophageal tumour growth. *Nature cell biology* **18**, 967-978,  
913 doi:10.1038/ncb3400 (2016).
- 914 3 Clayton, E. *et al.* A single type of progenitor cell maintains normal epidermis. *Nature* **446**,  
915 185-189 (2007).

916 4 Alcolea, M. P. *et al.* Differentiation imbalance in single oesophageal progenitor cells causes  
917 clonal immortalization and field change. *Nature cell biology* **16**, 615-622,  
918 doi:10.1038/ncb2963 (2014).  
919 5 Li, H. Aligning sequence reads, clone sequences and assembly contigs with BWA-MEM.  
920 *ArXiv*, 1303.3997 (2013).  
921
