# Supplementary material
Source: PubMed Central journal article supplement (PMC7116672)

Extended Data 1

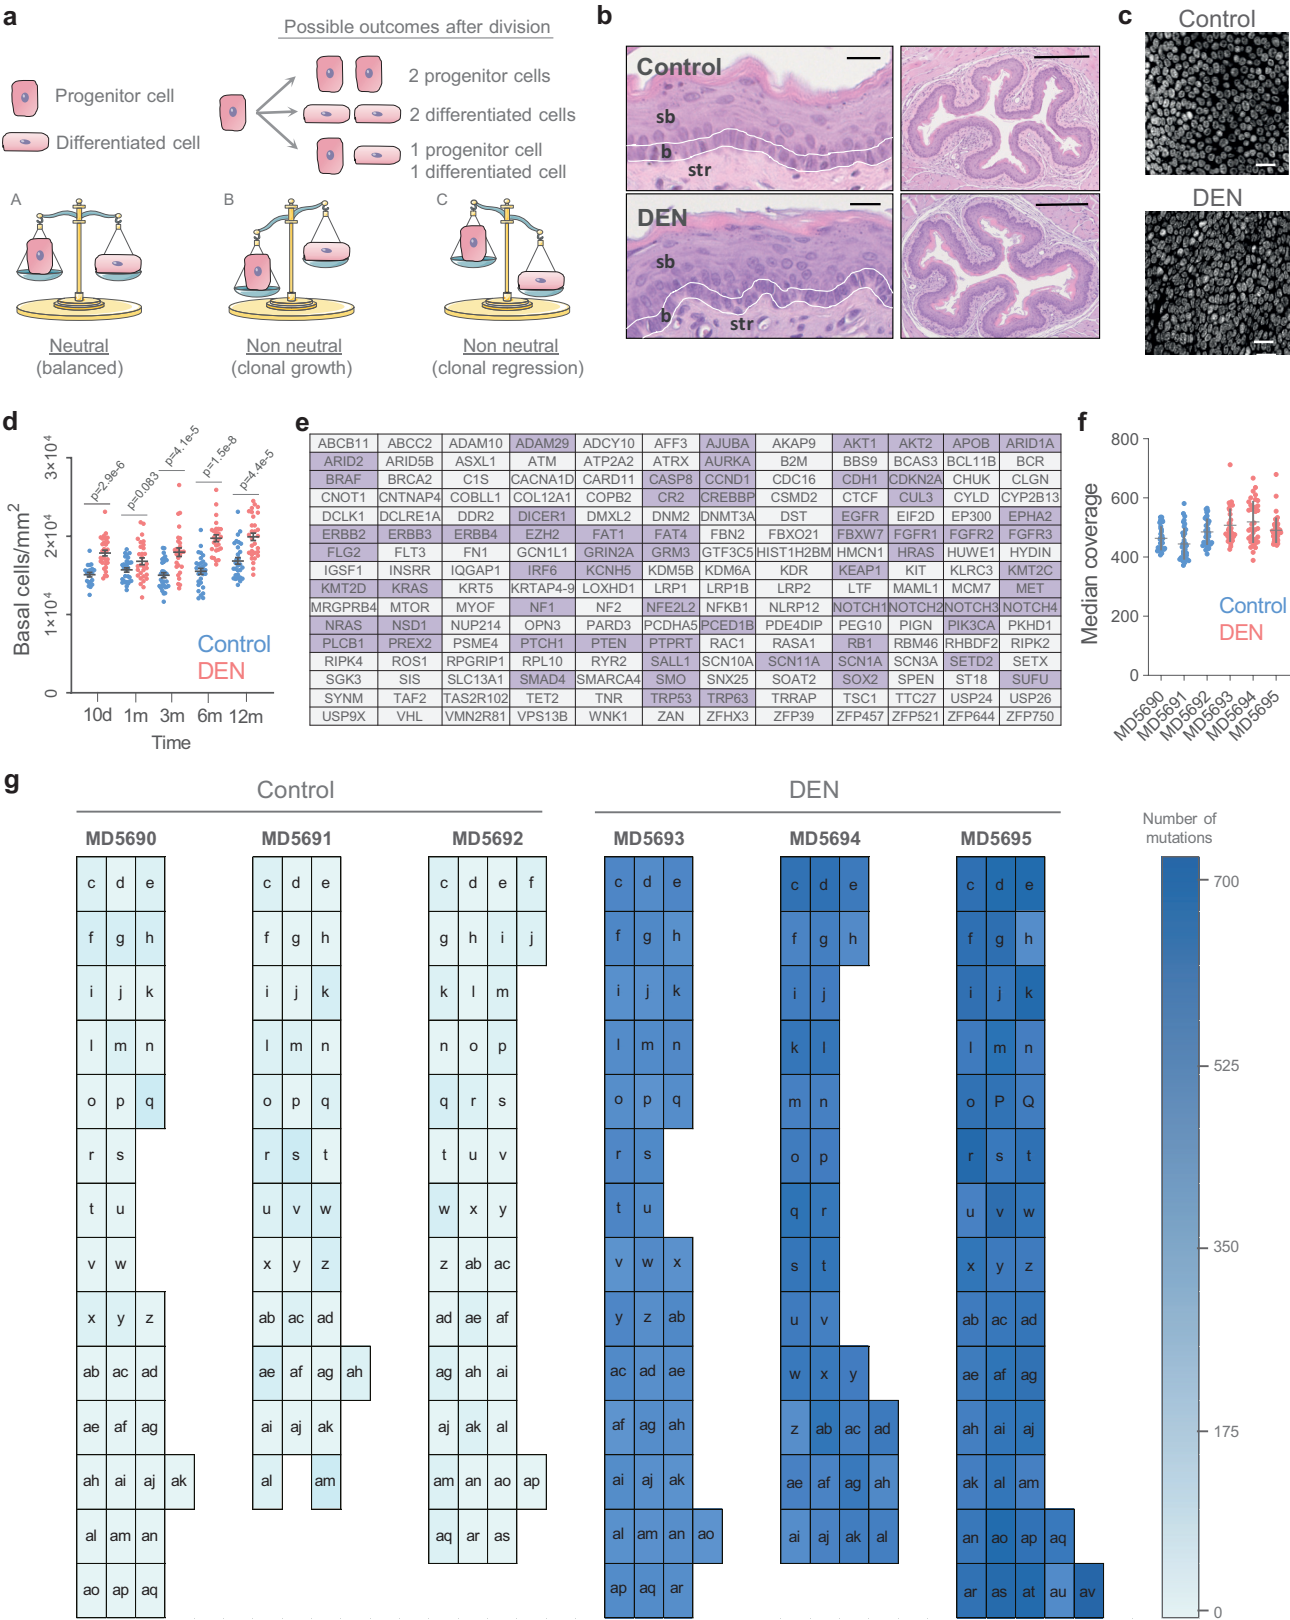

Supplement: EMS114216-supplement-Extended_data_1.pdf [file EMS114216-supplement-Extended_data_1.pdf]

## Extended Data 2

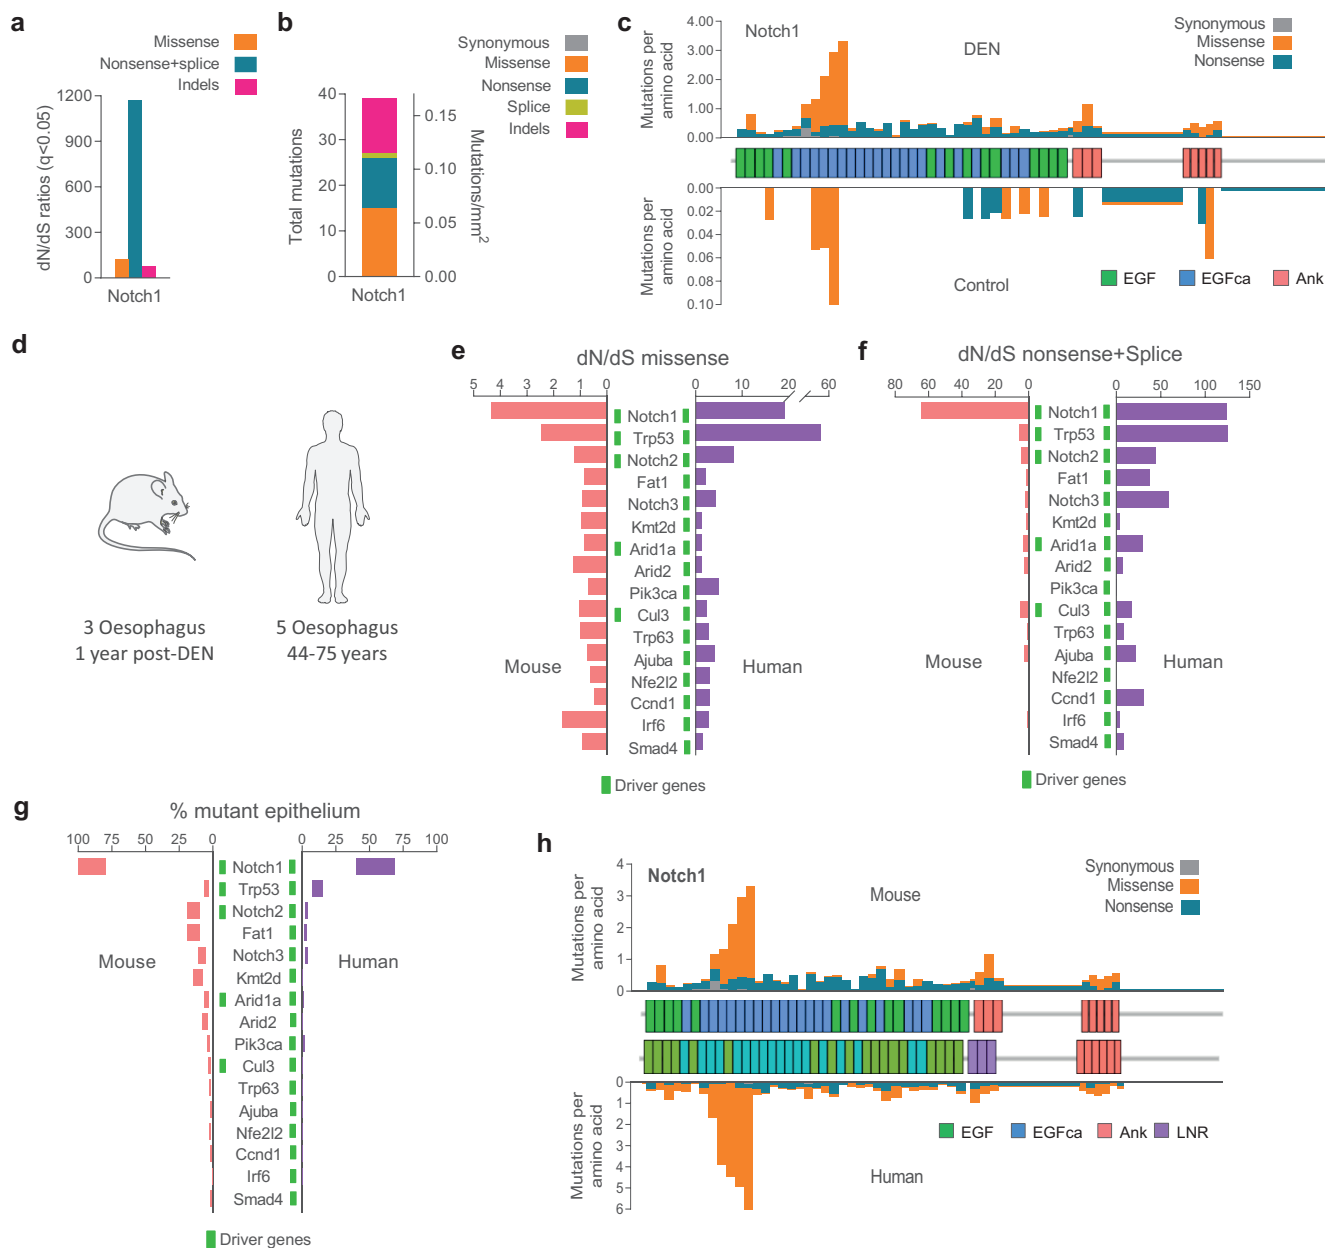

Supplement: EMS114216-supplement-Extended_data_2.pdf [file EMS114216-supplement-Extended_data_2.pdf]

Extended Data 3

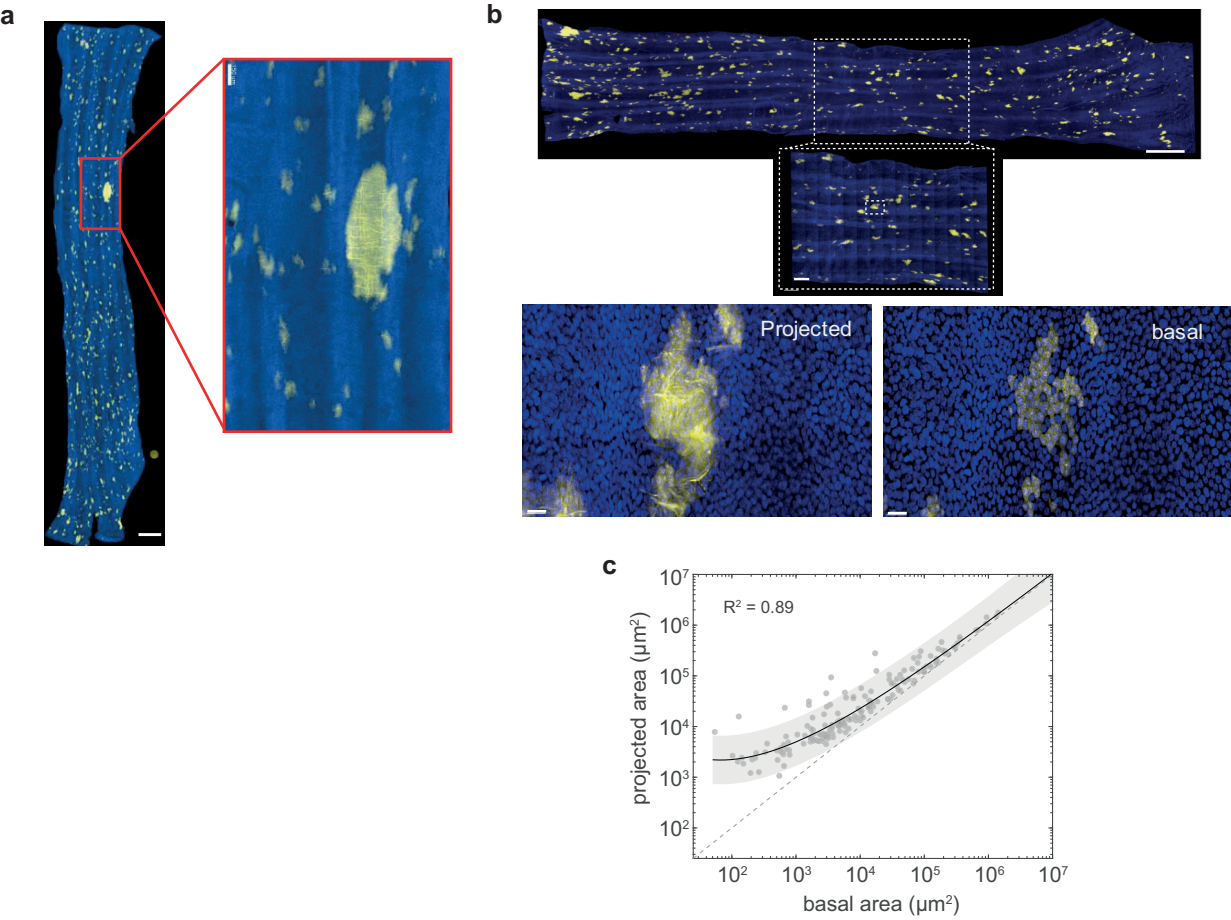

Supplement: EMS114216-supplement-Extended_data_3.pdf [file EMS114216-supplement-Extended_data_3.pdf]

# Extended Data 4

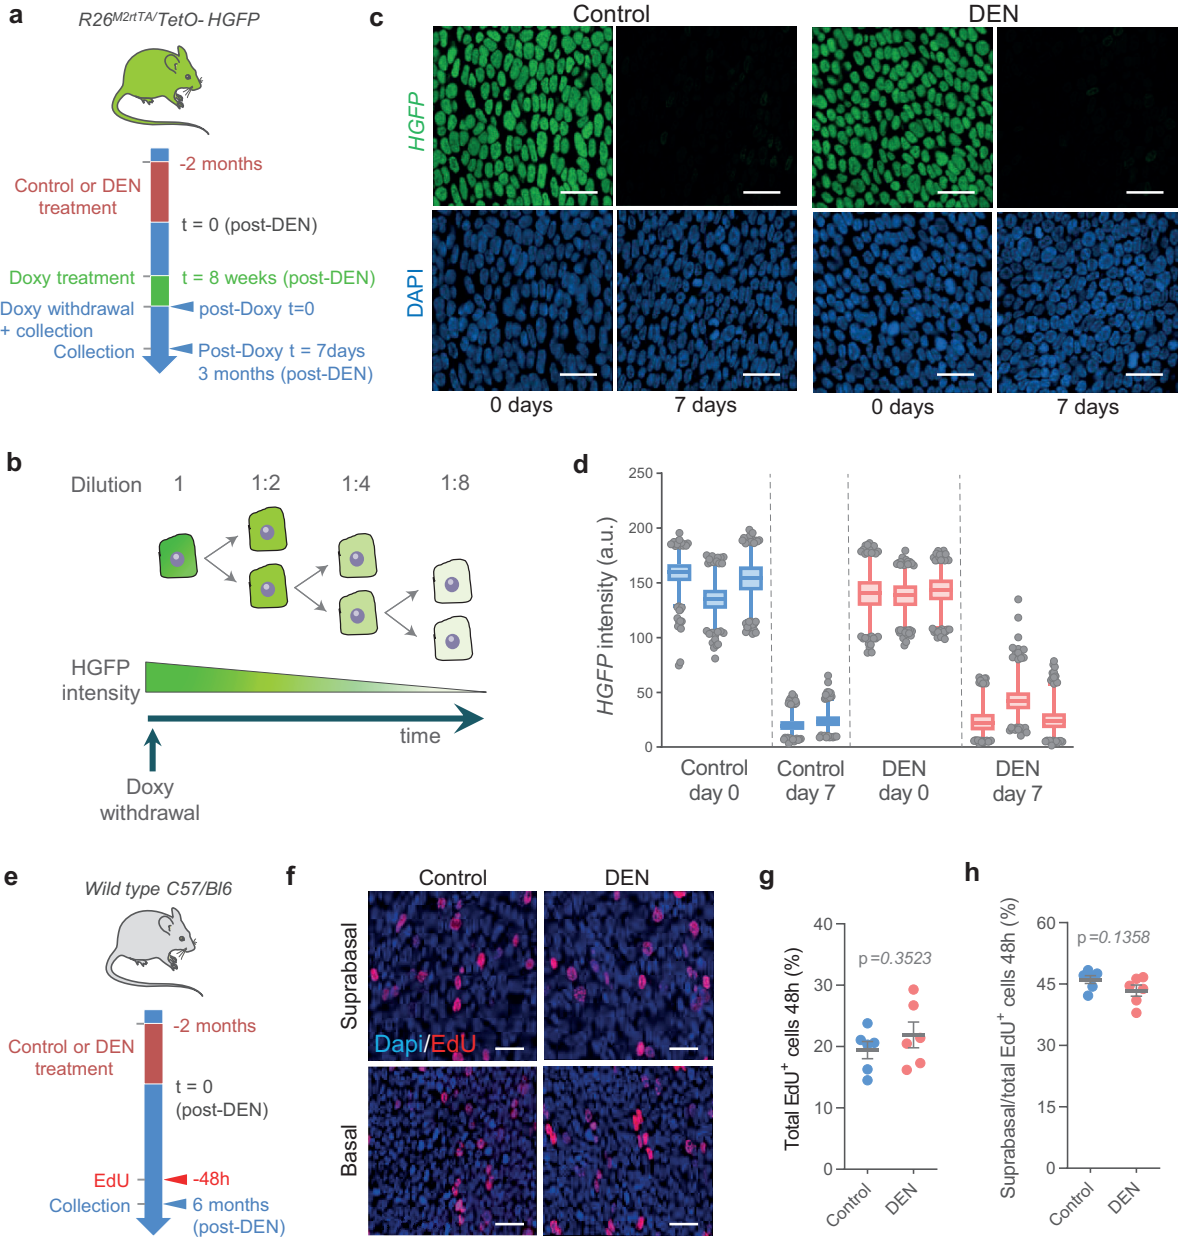

Supplement: EMS114216-supplement-Extended_data_4.pdf [file EMS114216-supplement-Extended_data_4.pdf]

Extended Data 5

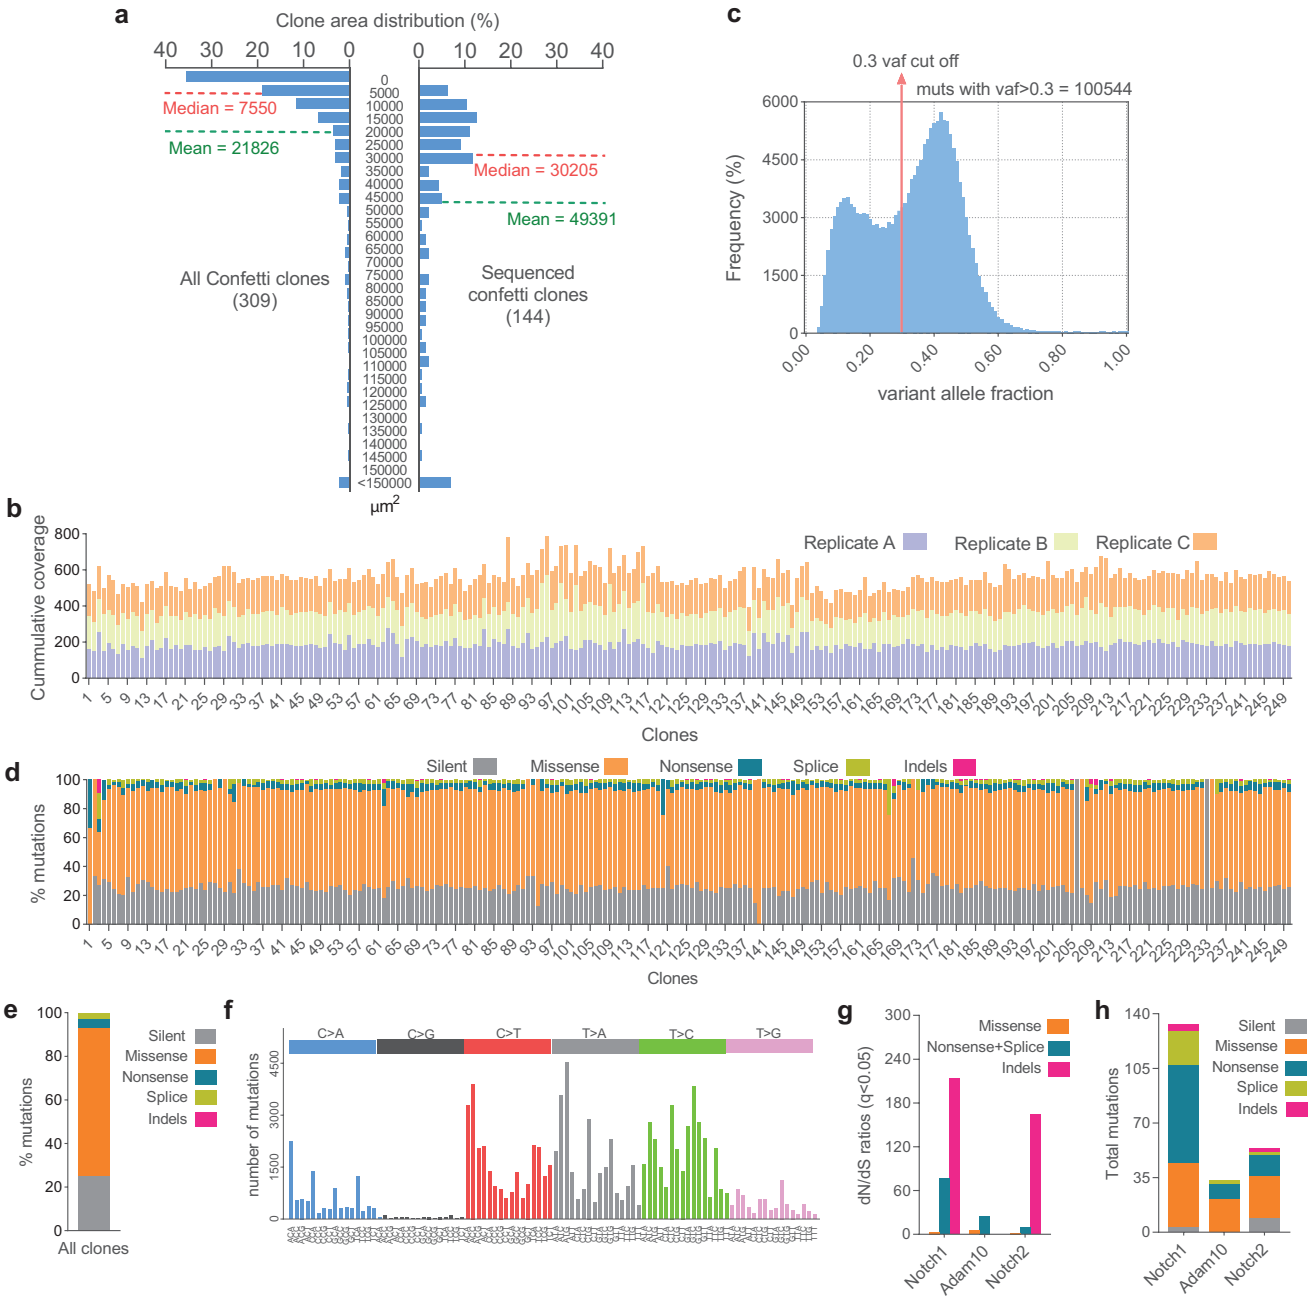

Supplement: EMS114216-supplement-Extended_data_5.pdf [file EMS114216-supplement-Extended_data_5.pdf]

# Extended Data 6

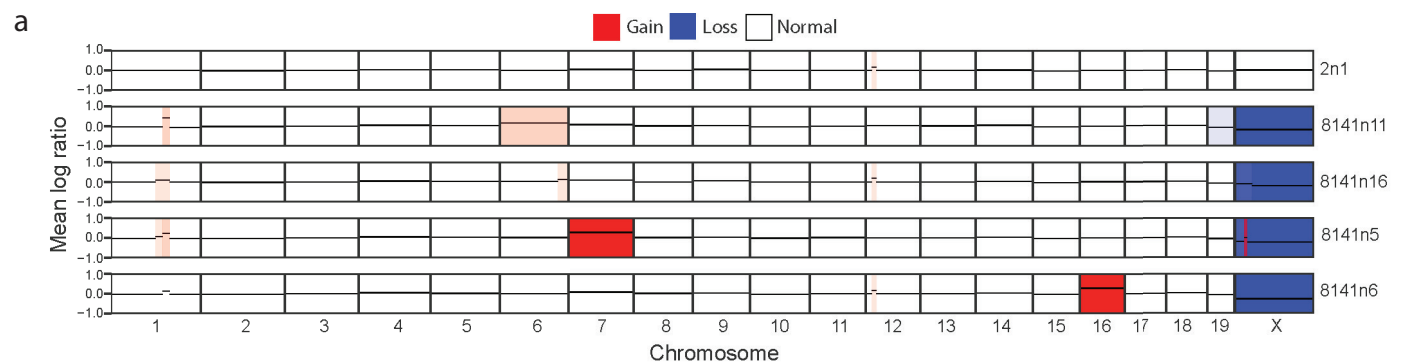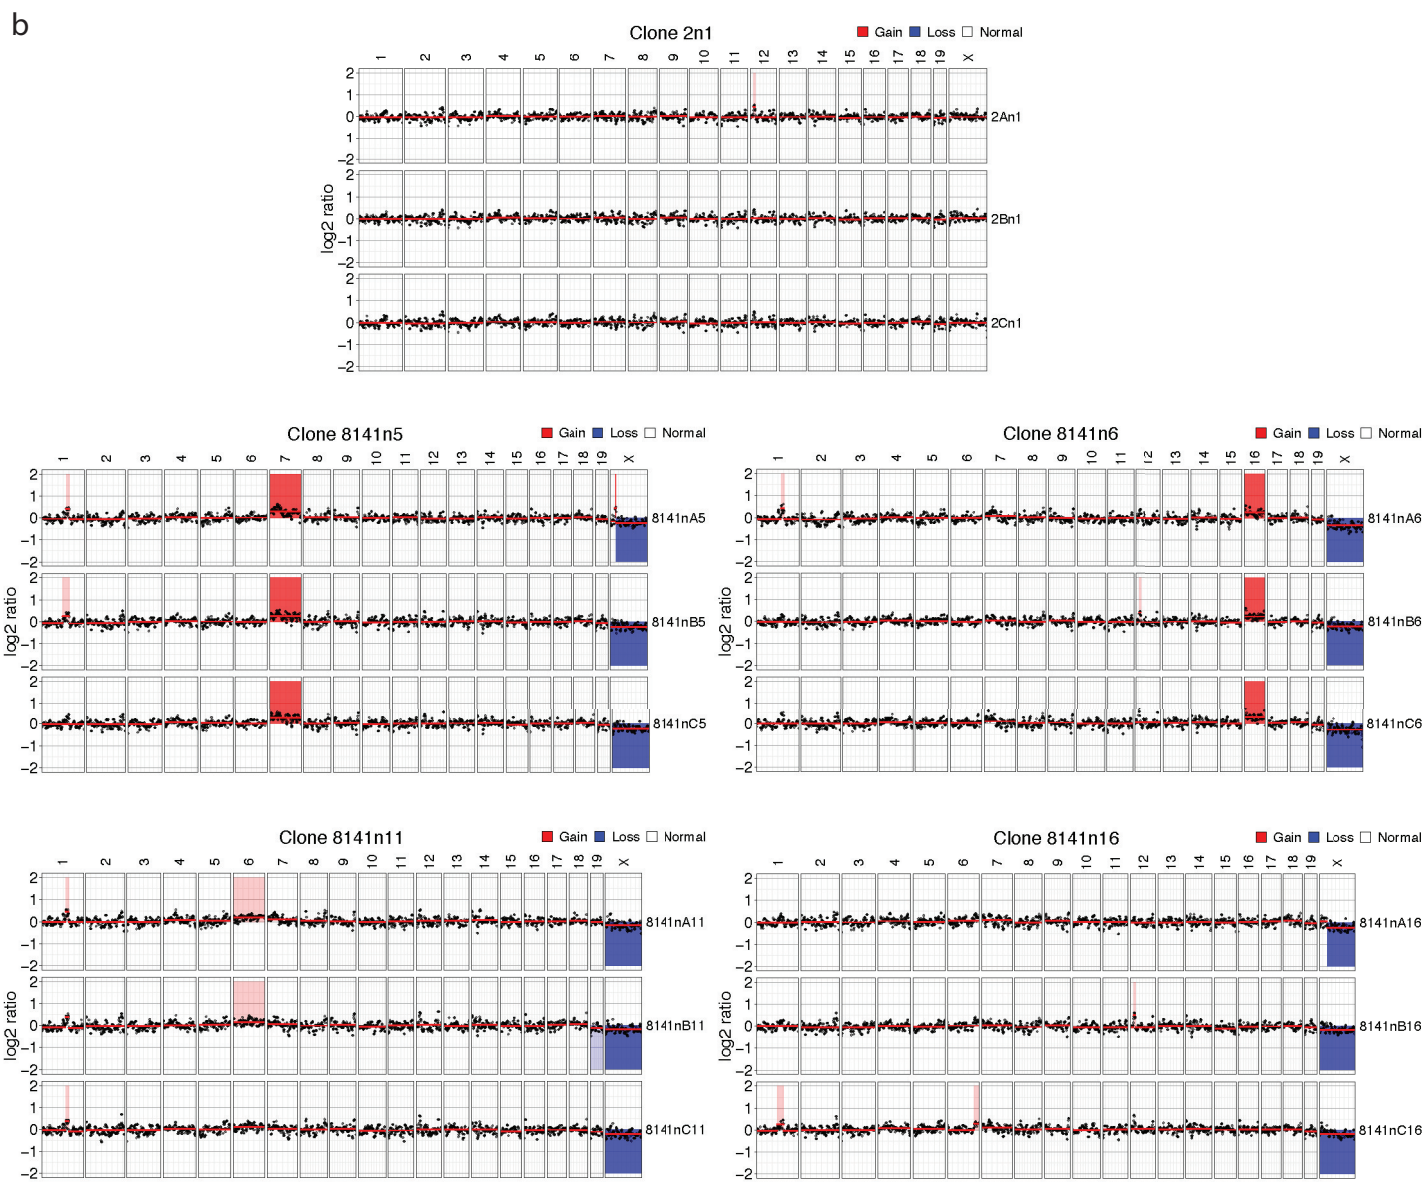

Supplement: EMS114216-supplement-Extended_data_6.pdf [file EMS114216-supplement-Extended_data_6.pdf]

Extended Data 7

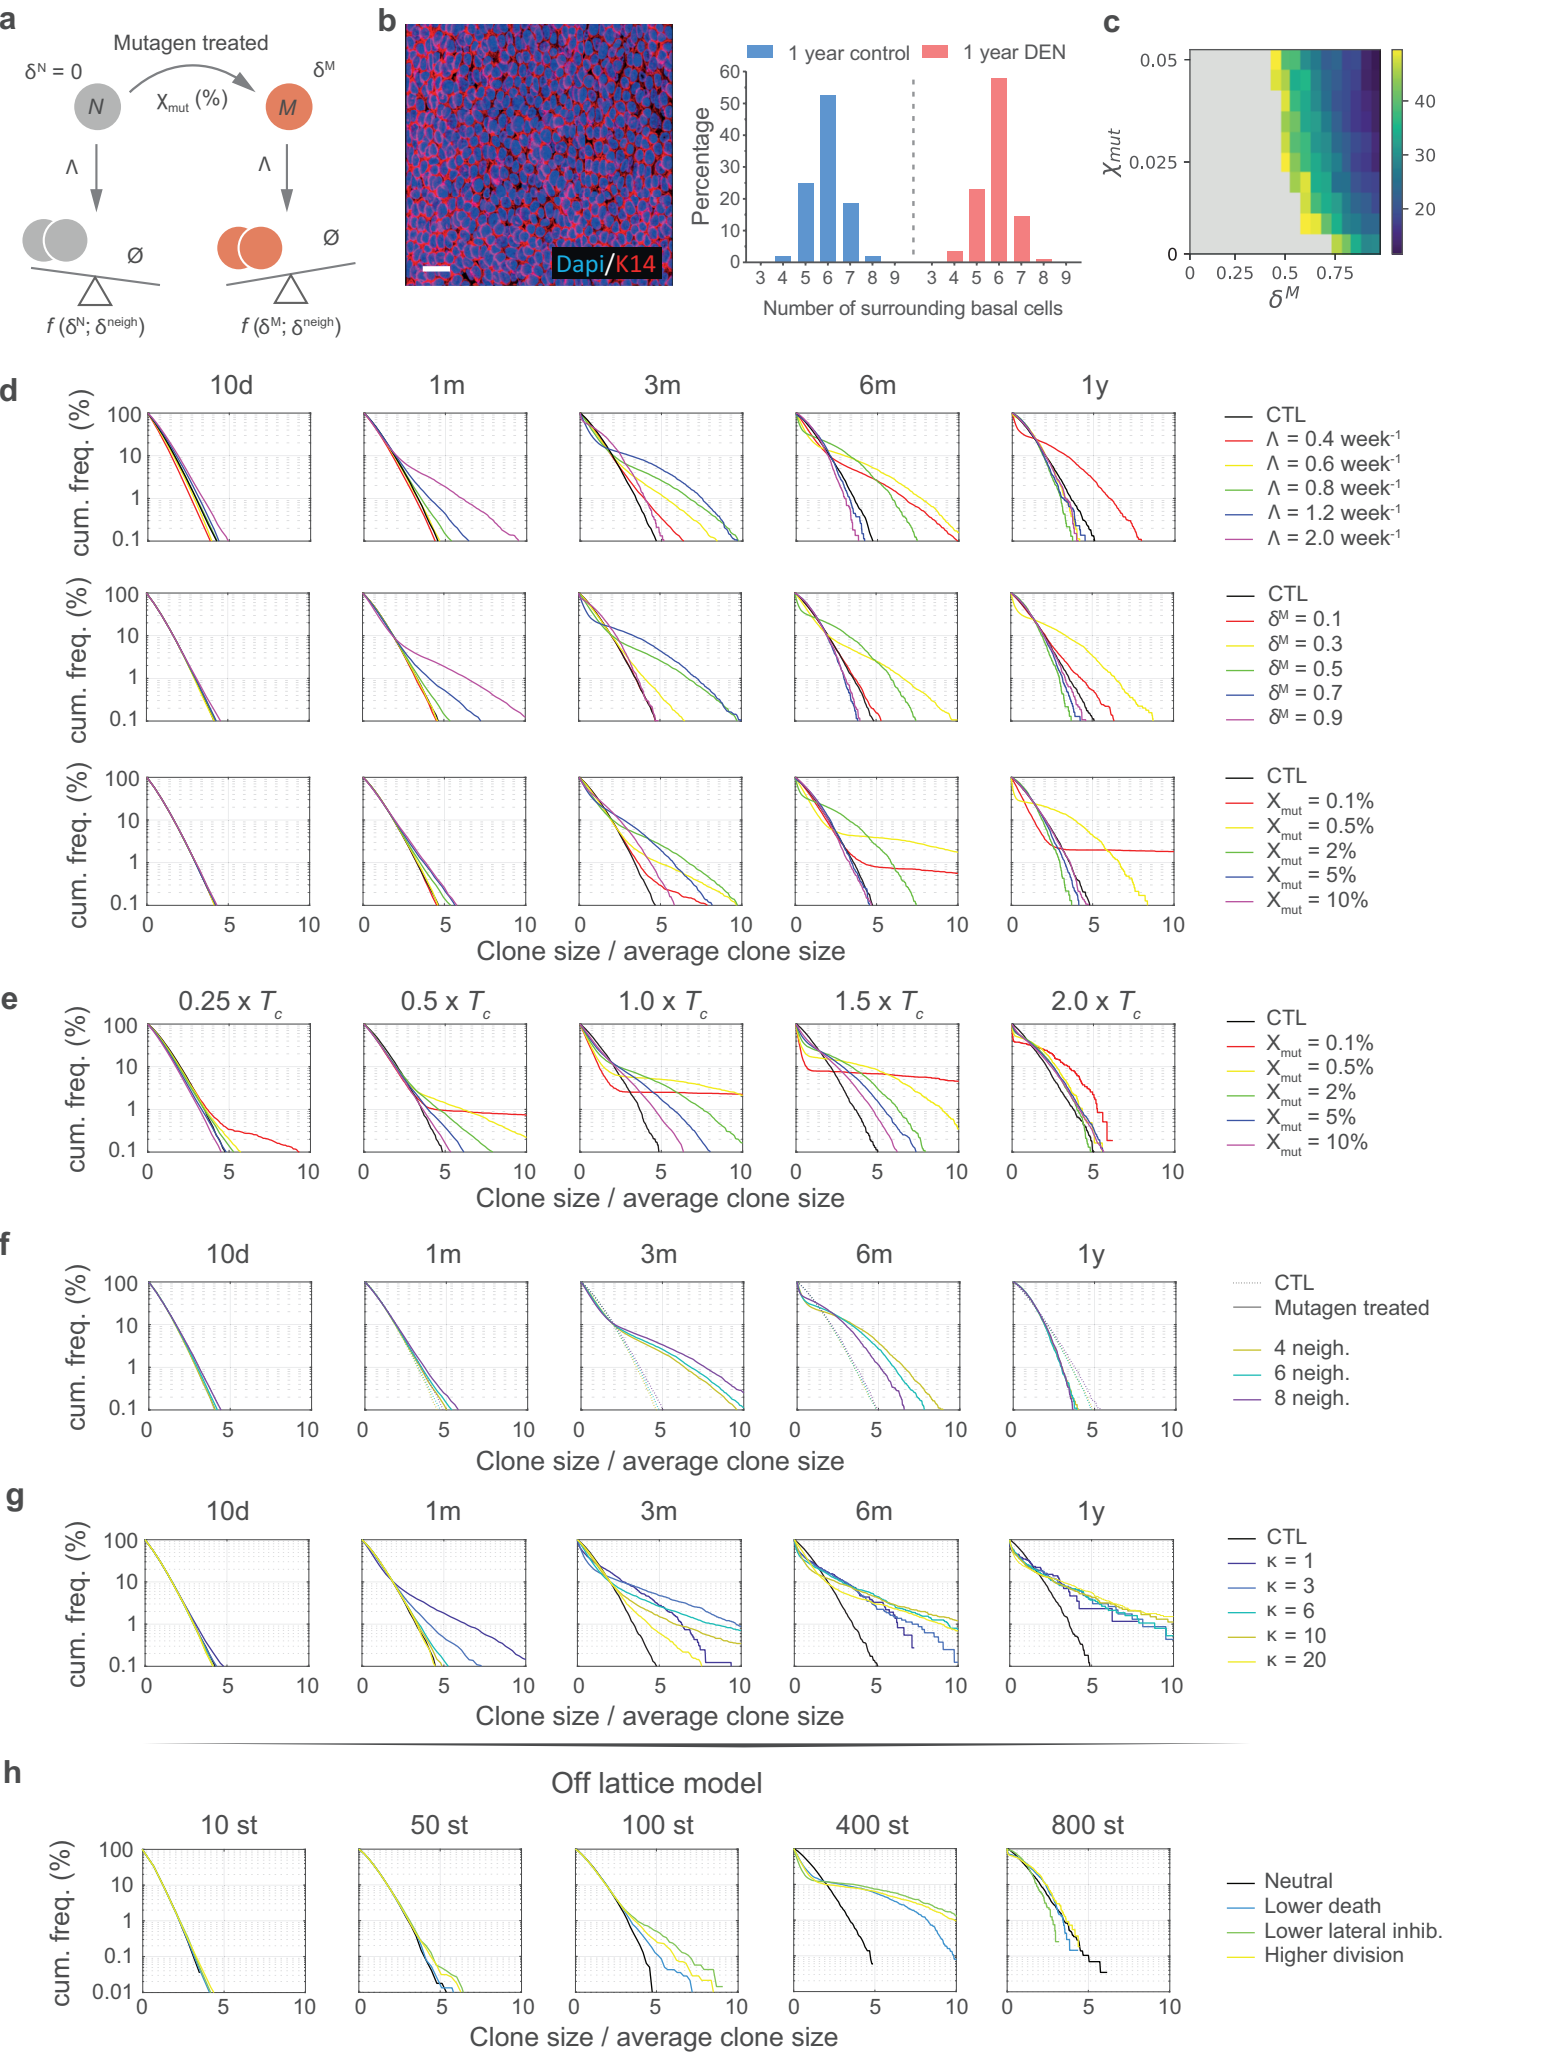

Supplement: EMS114216-supplement-Extended_data_7.pdf [file EMS114216-supplement-Extended_data_7.pdf]

## Extended Data 8

**a**

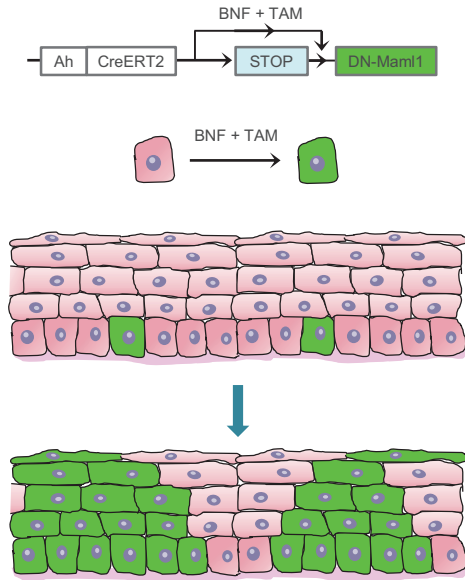

**b**

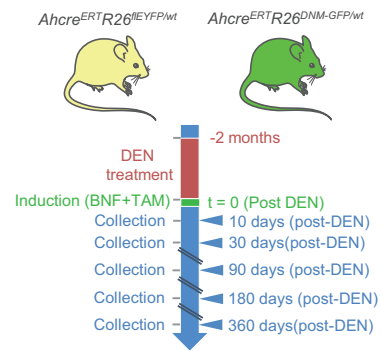

**c**

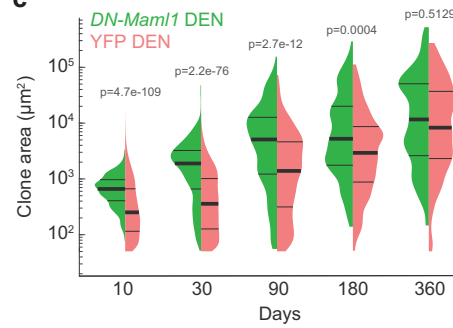

**d**

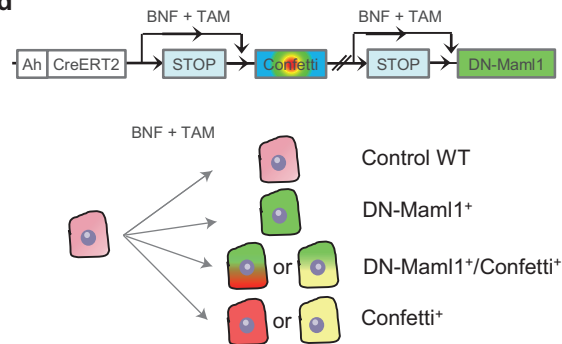

Supplement: EMS114216-supplement-Extended_data_8.pdf [file EMS114216-supplement-Extended_data_8.pdf]
